# Supplementary material for: Applicability of chloroplast DNA barcodes for wood identification between Santalum album and its adulterants
Source: publisher site journal article supplement (doi:10.1515/hf-2018-0047), 2018-08-27
Supplement: Supplementary file 1 [file hf-2018-0047_suppl.zip]

## Sheet: Sheet1
Table S1 Samples details and sequences information in this study.
Code	Species	Sample ID	Abbreviation	Type of sample	Sample notes	Region of origin	Conservation status	GenBank accession numbers
								matK	psbA-trnH	trnK	trnL
1	Santalum acuminatum (R. Br.) A. DC.	AD205086	S. acuminatum 1	Herbarium leaf	Collected by Marlene Friebe, May 31th, 2007; identified by D.D. Cunningham	South Australia, North-western	CITES-Appendix II, IUCN Vulnerable species	MG650425	MG650389	MG650298	MG650345
2		AD252176	S. acuminatum 2	Herbarium leaf	Collected by P.K. Latz, May 12th, 2010; identified by P.K. Latz	South Australia, North-western		MG650426	MG650390	MG650299	MG650346
3		AD252134	S. acuminatum 3	Herbarium leaf	Collected by P.K. Latz, May 13th, 2007; identified by P.K. Latz	South Australia, North-western		MG650427	MG650391	MG650300	MG650347
4		AD122378	S. acuminatum 4	Herbarium leaf	Collected by Marlene Friebe, August 16th, 2001; identified by D. Cunningham	South Australia, North-western		MG650428	MG650392	MG650301	MG650348
5		AD250223	S. acuminatum 5	Herbarium leaf	Collected by C.J. Brodie, October 7th, 2011; identified by C.J. Brodie	South Australia, Eyre Peninsula		MG650429	MG650393	MG650302	MG650349
6		CAFW25918	S. acuminatum 6	Heartwood	Collected by D.C. Clark;	Western Australia		MG650430	MG650394	MG650303	—
7		CAFW25919	S. acuminatum 7	Heartwood	Collected by D.C. Clark;	Western Australia		MG650431	MG650395	MG650304	MG650350
8		CAFW26242	S. acuminatum 8	Heartwood	Collected by D.C. Clark;	Western Australia		MG650432	—	MG650305	MG650351
9		CAFW26243	S. acuminatum 9	Heartwood	Collected by D.C. Clark;	Western Australia		—	—	—	—
10		CAFW26244	S. acuminatum 10	Heartwood	Collected by D.C. Clark;	Western Australia		—	—	—	—
11	Santalum album L.	W001	S. album 1	Heartwood	Collected by L Jiao, January 20th, 2014; identified by X Jiang	Guangdong, China	CITES-Appendix II	MG650437	MG650398	MG650310	MG650354
12		W002	S. album 2	Sapwood	Collected by L Jiao, January 20th, 2014; identified by X Jiang	Guangdong, China		MG650438	MG650399	MG650311	MG650355
13		W003	S. album 3	Heartwood	Collected by L Jiao, January 20th, 2014; identified by X Jiang	Guangdong, China		MG650439	MG650400	MG650312	MG650356
14		W004	S. album 4	Sapwood	Collected by L Jiao, January 20th, 2014; identified by X Jiang	Guangdong, China		MG650440	MG650401	MG650313	MG650357
15		W005	S. album 5	Heartwood	Collected by L Jiao, January 20th, 2014; identified by X Jiang	Guangdong, China		MG650441	MG650402	MG650314	MG650358
16		W006	S. album 6	Sapwood	Collected by L Jiao, January 20th, 2014; identified by X Jiang	Guangdong, China		MG650442	MG650403	MG650315	MG650359
17		W007	S. album 7	Heartwood	Collected by L Jiao, January 20th, 2014; identified by X Jiang	Guangdong, China		MG650443	MG650404	MG650316	MG650360
18		W008	S. album 8	Sapwood	Collected by L Jiao, January 20th, 2014; identified by X Jiang	Guangdong, China		MG650444	MG650405	MG650317	MG650361
19		L001	S. album 9	Leaf	Collected by L Jiao, January 20th, 2014; identified by X Jiang	Guangdong, China		MG650445	MG650406	MG650318	MG650362
20		L002	S. album 10	Leaf	Collected by L Jiao, January 20th, 2014; identified by X Jiang	Guangdong, China		MG650446	MG650407	MG650319	MG650363
21		L003	S. album 11	Leaf	Collected by L Jiao, January 20th, 2014; identified by X Jiang	Guangdong, China		MG650447	MG650408	MG650320	MG650364
22		L004	S. album 12	Leaf	Collected by L Jiao, January 20th, 2014; identified by X Jiang	Guangdong, China		MG650448	MG650409	MG650321	MG650365
23		L005	S. album 13	Leaf	Collected by L Jiao, January 20th, 2014; identified by X Jiang	Guangdong, China		MG650449	MG650410	MG650322	MG650366
24		CAFW10464	S. album 14	Heartwood	Collected by Collection Team of Chinese Research Institute of Wood Industry	Australia		MG650433	—	MG650306	—
25		CAFW7309	S. album 15	Heartwood	Collected by Collection Team of Chinese Research Institute of Wood Industry	China		MG650434	—	MG650307	—
26		CAFW10465	S. album 16	Heartwood	Collected by Collection Team of Chinese Research Institute of Wood Industry	Australia		MG650435	MG650396	MG650308	MG650352
27		CAFW26246	S. album 17	Heartwood	Collected by D.C. Clark;	Western Australia		MG650436	MG650397	MG650309	MG650353
28	Santalum lanceolatum R.Br	AD237833	S. lanceolatum 1	Herbarium leaf	Collected by C.J. Brodie, April 23th, 2010; identified by D.E. Symon	South Australia, Gairdner-Torrens	CITES-Appendix II, IUCN Vulnerable species	MG650450	MG650411	MG650323	MG650367
29		AD240999	S. lanceolatum 2	Herbarium leaf	Collected by H.P. Vonow, October 26th, 2010; identified by D.D. Cunningham	South Australia, Gairdner-Torrens		MG650451	MG650412	MG650324	MG650368
30		AD240995	S. lanceolatum 3	Herbarium leaf	Collected by H.P. Vonow, October 25th, 2010; identified by D.D. Cunningham	South Australia, Gairdner-Torrens		MG650452	MG650413	MG650325	MG650369
31		AD211157	S. lanceolatum 4	Herbarium leaf	Collected by D.J. Duval, November 24th, 2005; identified by D.D. Cunningham	South Australia, North-western		MG650453	MG650414	MG650326	MG650370
32		AD237255	S. lanceolatum 5	Herbarium leaf	Collected by C.J. Brodie, April 21th, 2010; identified by D.E. Symon	South Australia, North-western		MG650454	MG650415	MG650327	MG650371
33		CAFW26247	S. lanceolatum 6	Heartwood	Collected by D.C. Clark;	Queensland, Australia		MG650455	—	MG650328	MG650372
34	Santalum murrayanumC.A.Gardner	AD232807	S. murrayanum1	Herbarium Leaf	Collected by T.S. Te, November 3th, 2009; identified by R.L. Taplin	South Australia, Eyre Peninsula	CITES-Appendix II, IUCN Vulnerable species	MG650456	MG650416	MG650329	MG650373
35		AD198046	S. murrayanum 2	Herbarium Leaf	Collected by D.J. Duval, September 6th, 2006; identified by D.D. Cunningham	South Australia, Eyre Peninsula		MG650457	MG650417	MG650330	MG650374
36		AD198047	S. murrayanum 3	Herbarium Leaf	Collected by D.J. Duval, September 6th, 2006; identified by D.D. Cunningham	South Australia, Eyre Peninsula		MG650458	MG650418	MG650331	MG650375
37		AD198041	S. murrayanum 4	Herbarium Leaf	Collected by D.J. Duval, September 6th, 2006; identified by D.D. Cunningham	South Australia, Eyre Peninsula		MG650459	MG650419	MG650332	MG650376
38		AD199687	S. murrayanum 5	Herbarium Leaf	Collected by D.E. Murfet, December 2nd, 2005; identified by D.E. Murfet	South Australia, Southern Lofty		MG650460	MG650420	MG650333	MG650377
39	Santalun spicatumA.DC	AD199266	S. spicatum 1	Herbarium leaf	Collected by A.M. Ashby, August 7th, 1971; identified by D.D. Cunningham	Western Australia	CITES-Appendix II, IUCN near threatened species	—	—	MG650334	MG650378
40		AD170792	S. spicatum 2	Herbarium leaf	Collected by F.J. Badman, January 6th, 2004; identified by F.J. Badman	South Australia, Eyre Peninsula		MG650461	—	MG650335	MG650379
41		AD170768	S. spicatum 3	Herbarium leaf	Collected by F.J. Badman, January 8th, 2004; identified by F.J. Badman	South Australia, Eyre Peninsula		MG650462	—	MG650336	MG650380
42		AD170793	S. spicatum 4	Herbarium leaf	Collected by F.J. Badman, January 6th, 2004; identified by F.J. Badman	South Australia, Eyre Peninsula		MG650463	—	MG650337	MG650381
43		AD192538	S. spicatum 5	Herbarium leaf	Collected by F.J. Badman, August 25th, 2005; identified by D.E. Symon	South Australia, Nullarbor		MG650464	—	MG650338	MG650382
44		CAFW25920	S. spicatum 6	Heartwood	Collected by J; identified by X Jiang	Western Australia		MG650465	MG650421	MG650340	MG650384
45		CAFW26248	S. spicatum 7	Heartwood	Collected by J; identified by X Jiang	Western Australia		MG650466	MG650422	MG650341	MG650385
46		CAFW23276	S. spicatum 8	Heartwood	Collected by Collection Team of Chinese Research Institute of Wood Industry	Australia		—	—	MG650339	MG650383
47		CAFW26249	S. spicatum 9	Heartwood	Collected by D.C. Clark;	Western Australia		MG650467	MG650423	MG650342	MG650386
48		CAFW26250	S. spicatum 10	Heartwood	Collected by D.C. Clark;	Western Australia		MG650468	—	MG650343	MG650387
49		CAFW26251	S. spicatum 11	Heartwood	Collected by D.C. Clark;	Western Australia		MG650469	MG650424	MG650344	MG650388
Note: 1) “—” of GenBank Accession numbers means failed PCR amplifications.
2) Samples marked in red indicate vouchered specimens.
