# Supplementary material for: Applicability of chloroplast DNA barcodes for wood identification between Santalum album and its adulterants
Source: publisher site journal article supplement (doi:10.1515/hf-2018-0047), 2018-08-27
Supplement: Supplementary file 1 [file hf-2018-0047_suppl.zip]

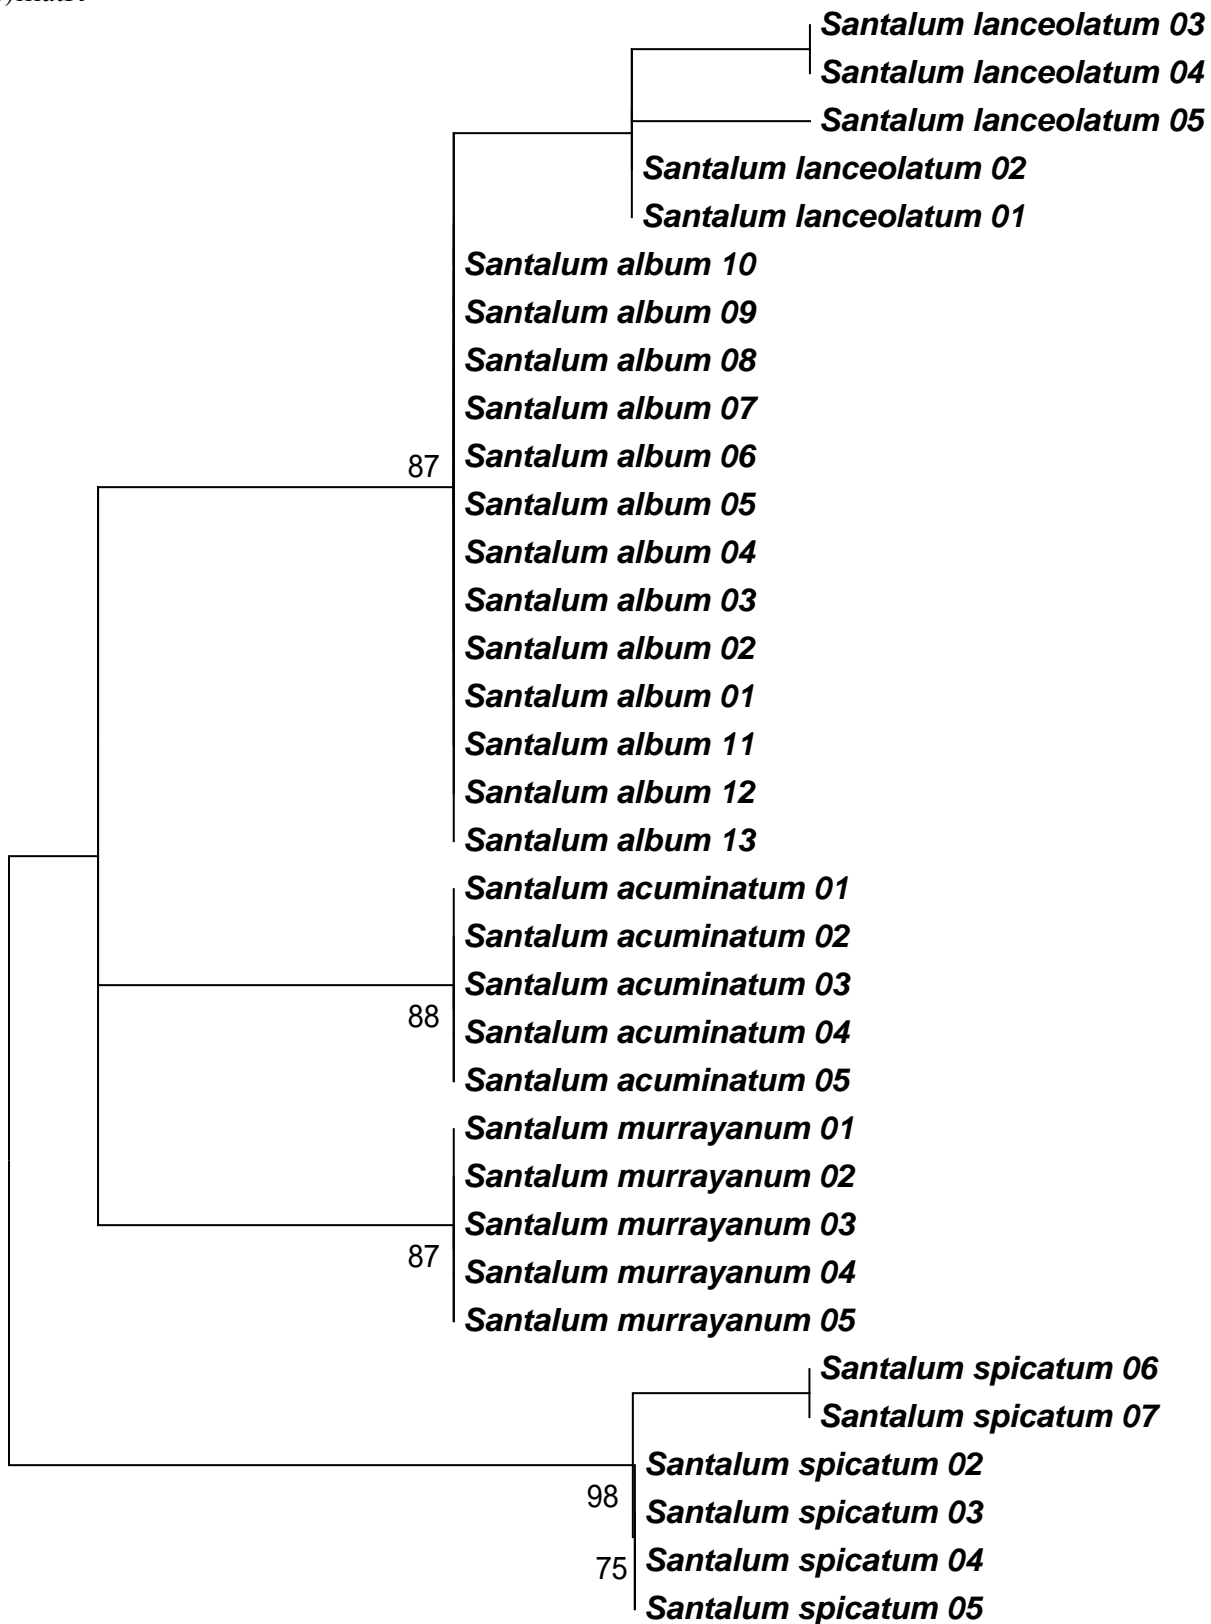

0.002

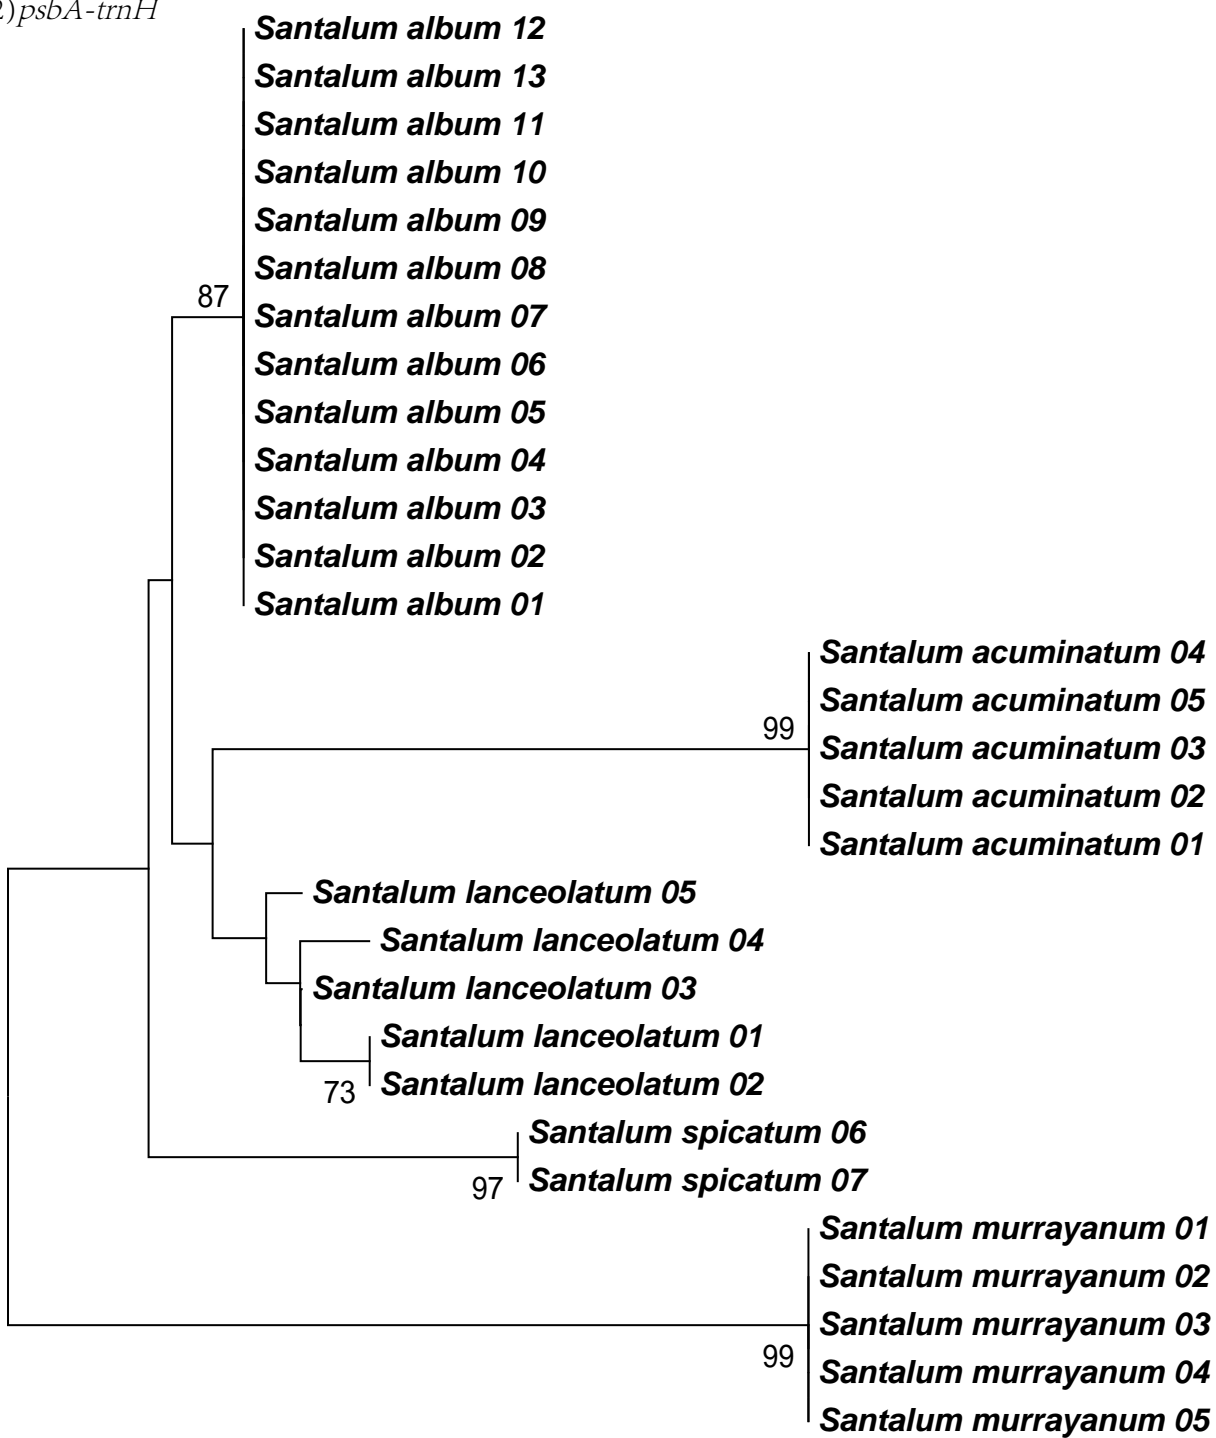

0.005

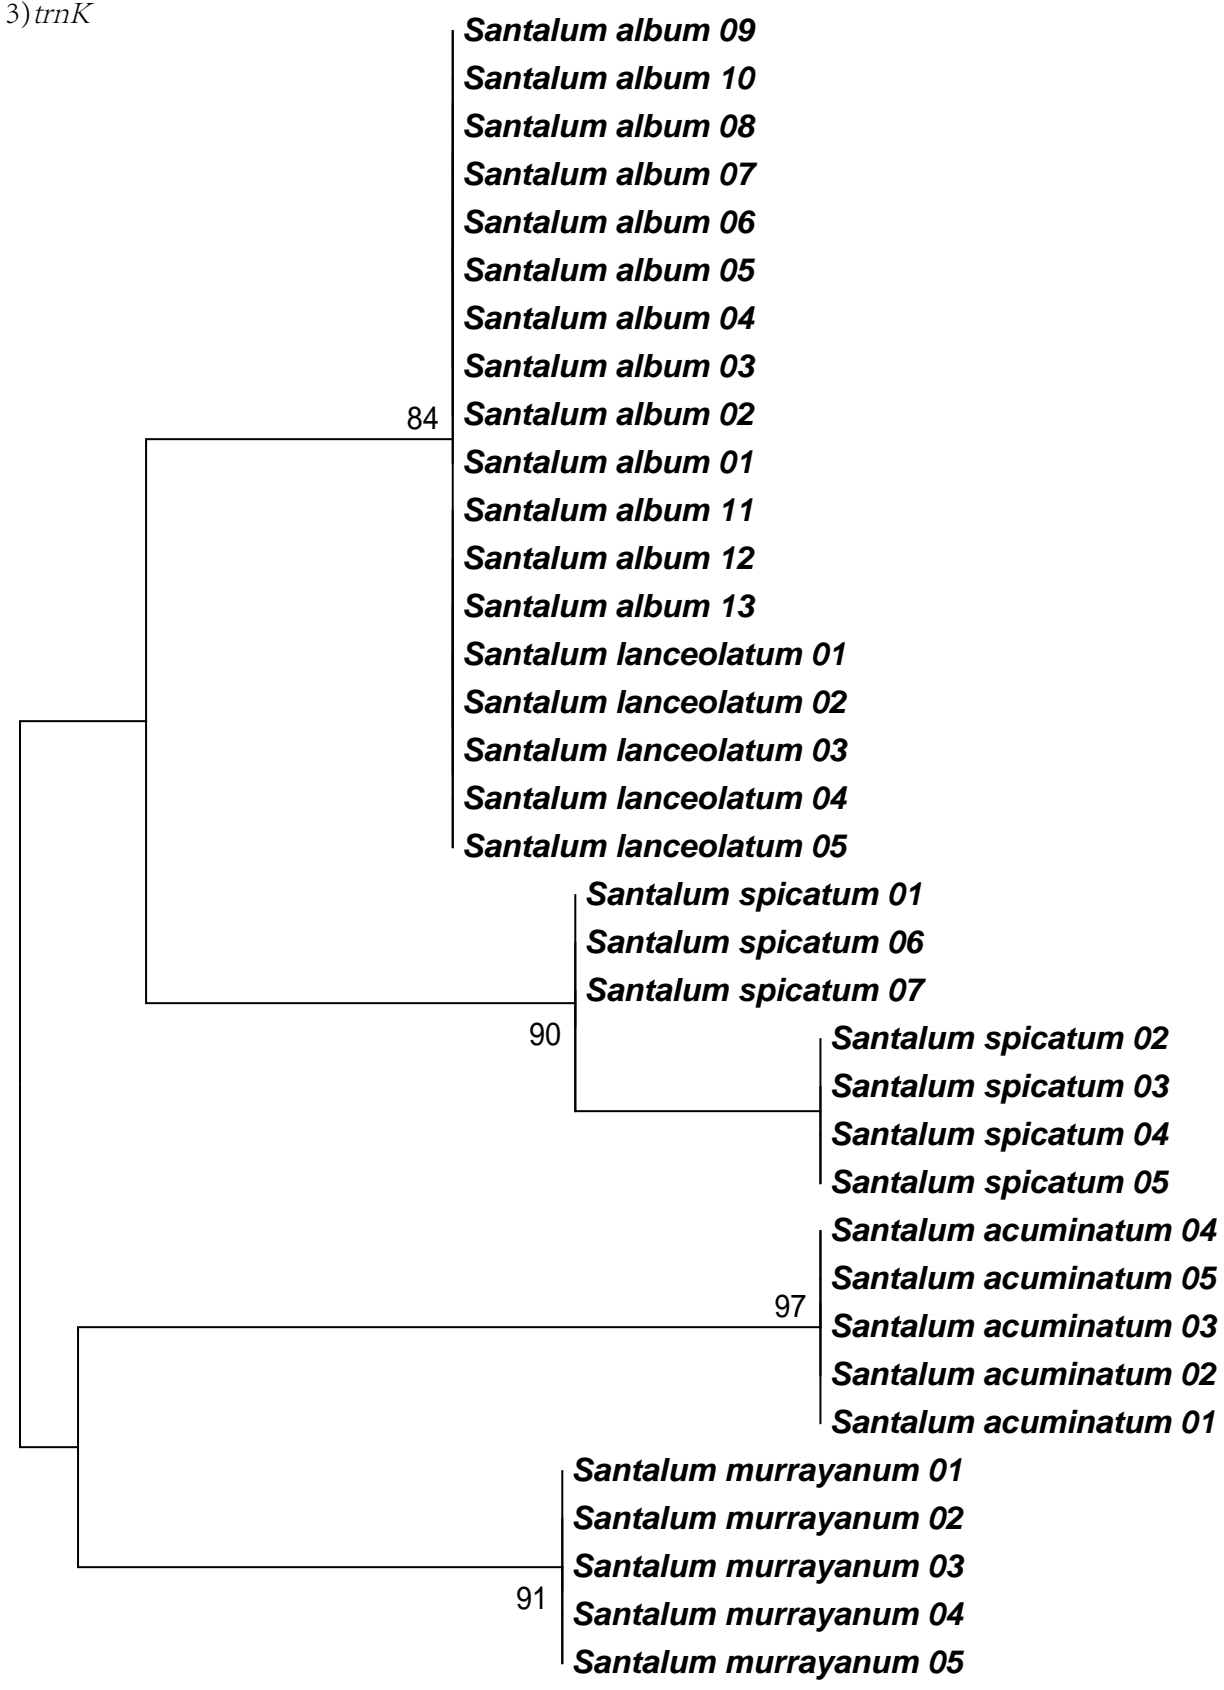

0.002

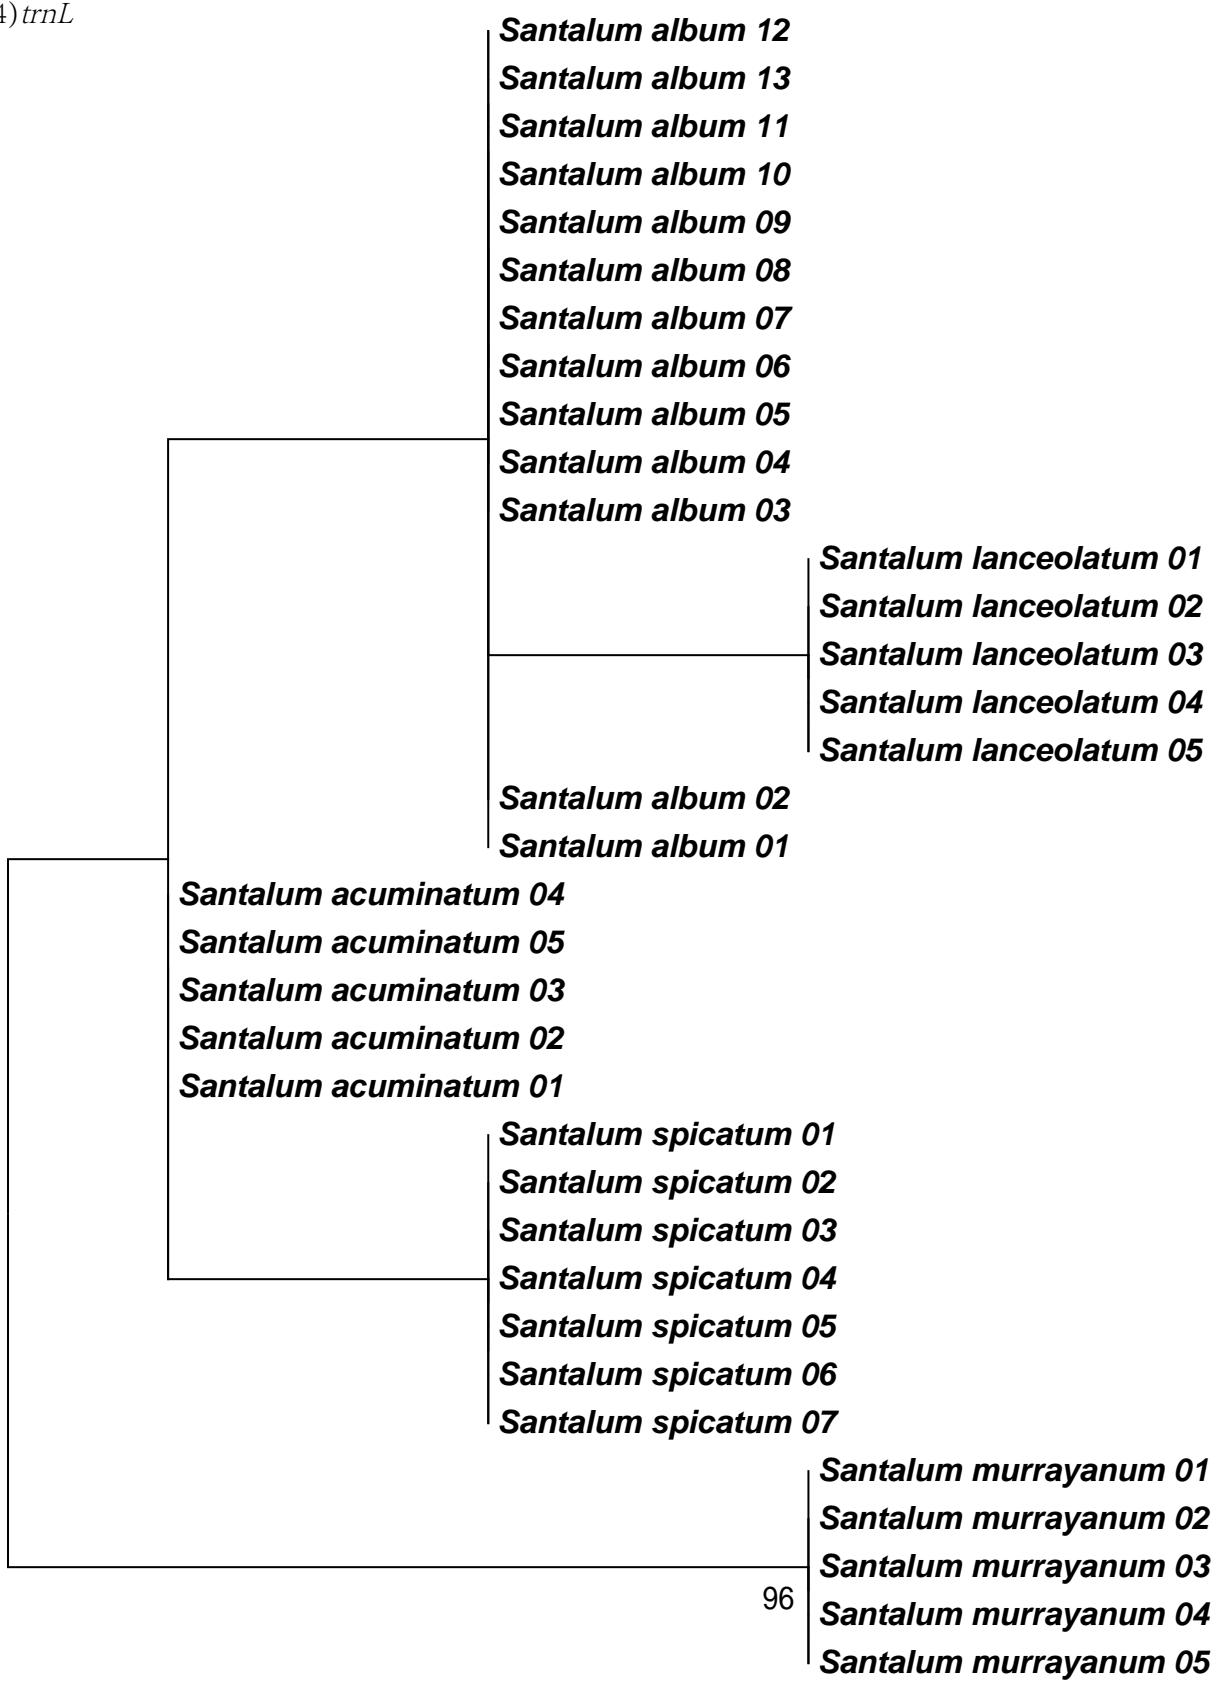

0.002

5) *matK+psbA-trnH*

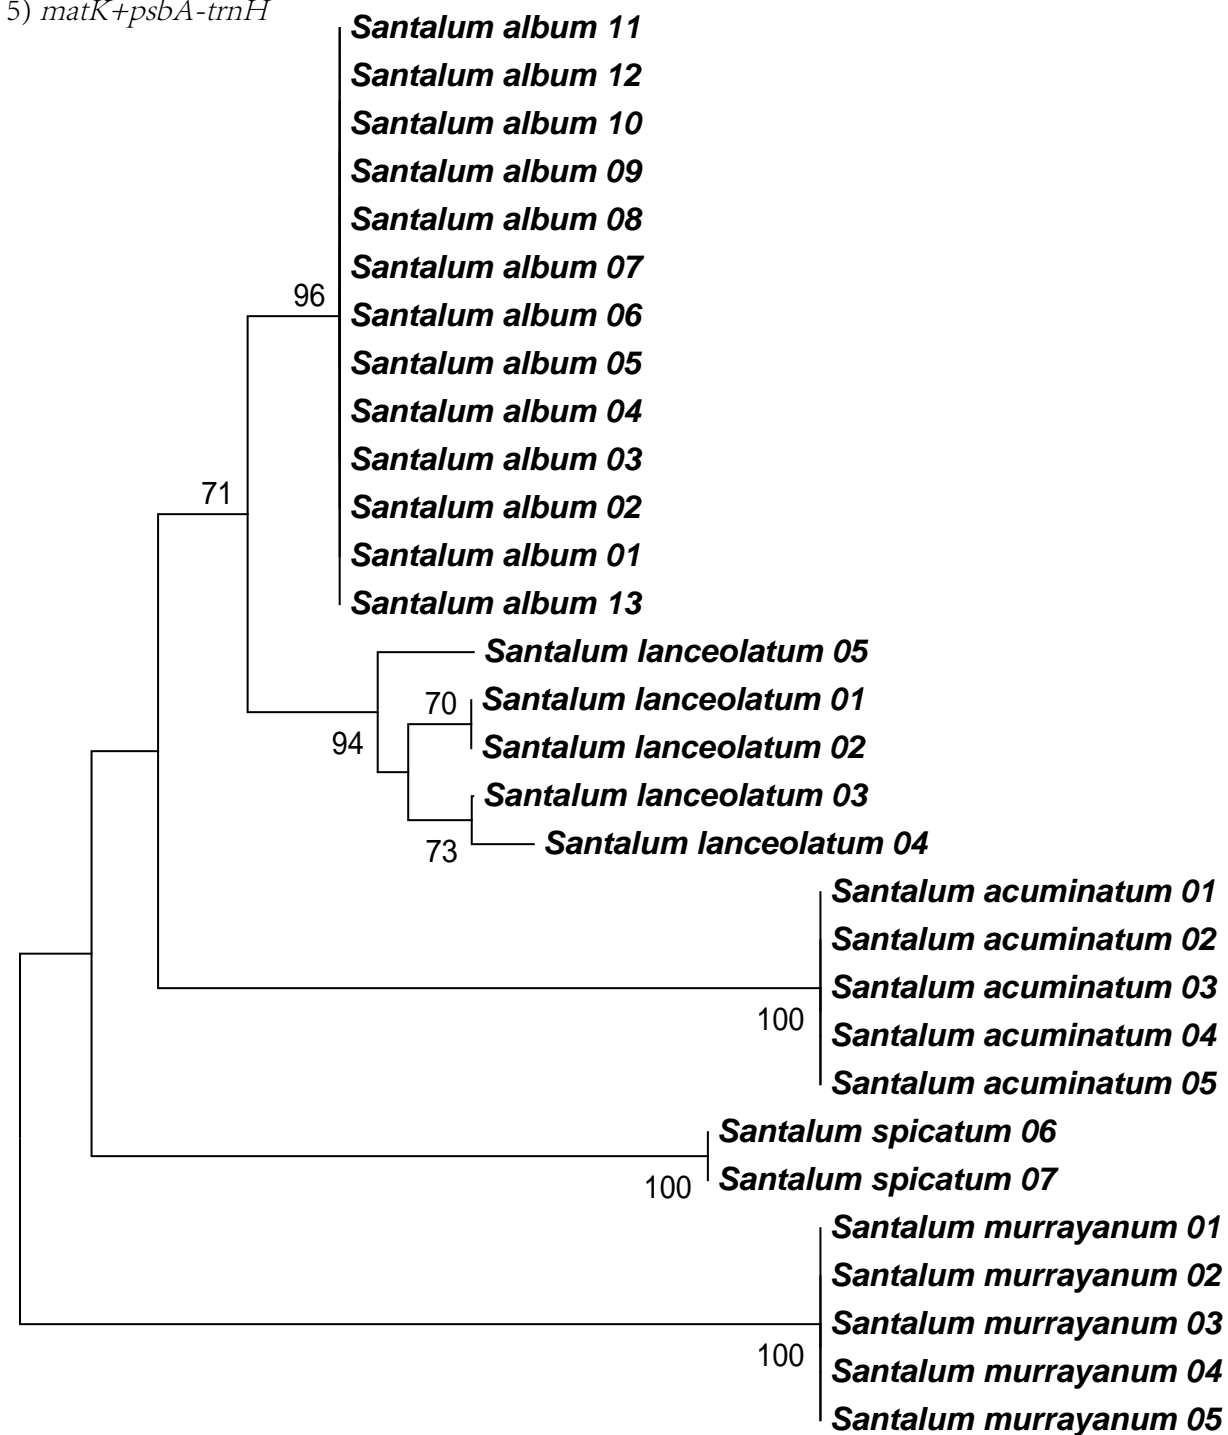

0.002

6) *matK+trnK*

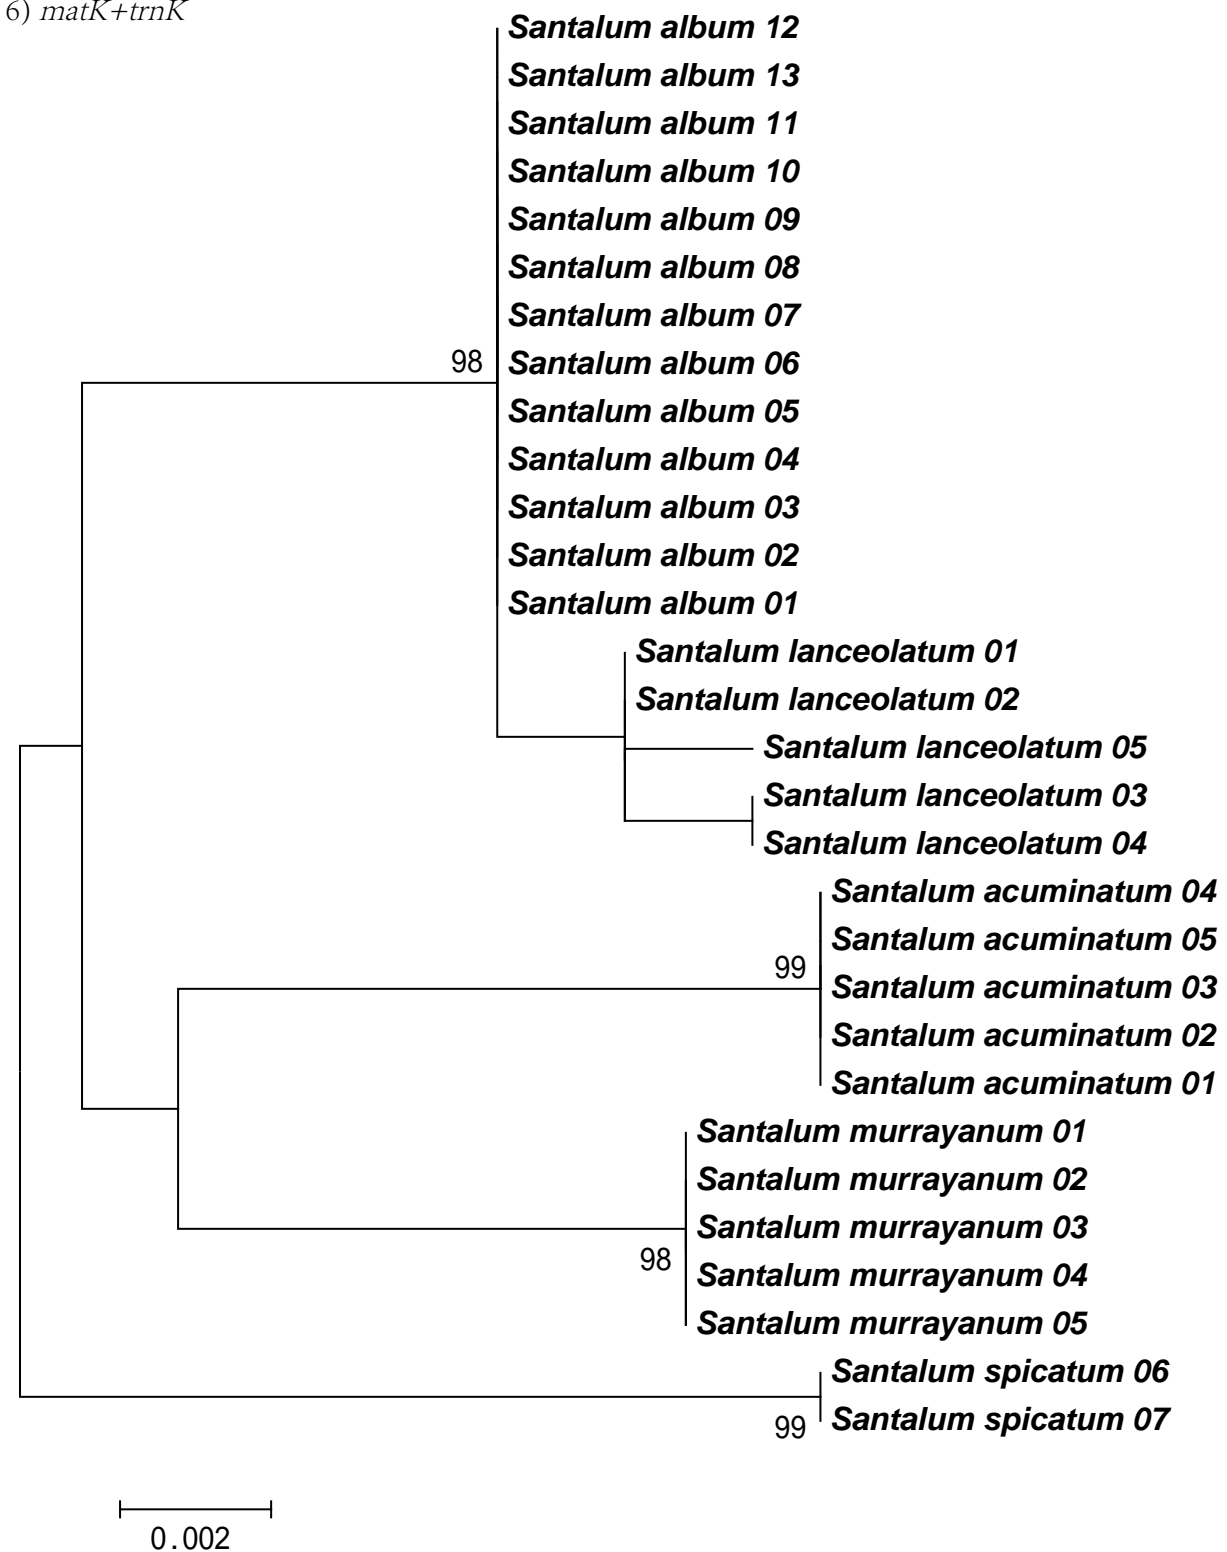

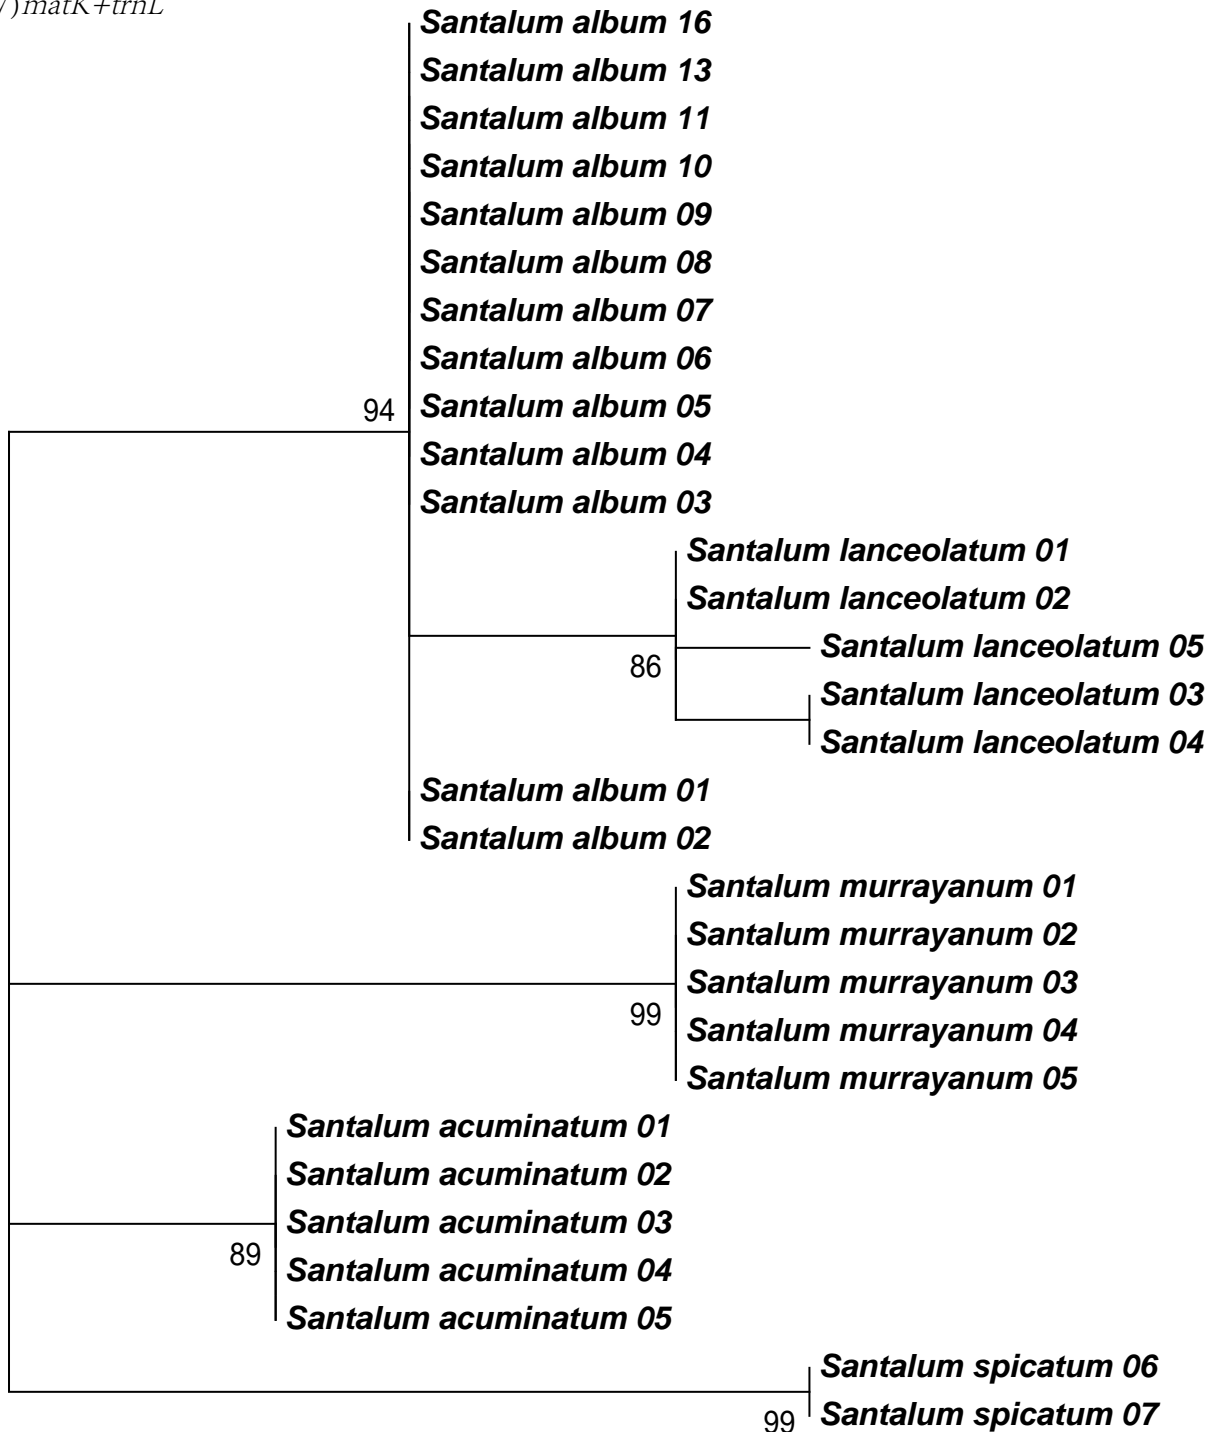

0.002

8) *psbA-trnH+trnK*

***Santalum album* 09**  
***Santalum album* 10**  
***Santalum album* 08**  
***Santalum album* 07**  
***Santalum album* 06**  
***Santalum album* 05**  
***Santalum album* 04**  
***Santalum album* 03**  
***Santalum album* 02**  
***Santalum album* 01**  
***Santalum album* 11**  
***Santalum album* 12**  
***Santalum album* 13**

***Santalum lanceolatum* 05**  
***Santalum lanceolatum* 04**  
***Santalum lanceolatum* 03**  
***Santalum lanceolatum* 01**  
***Santalum lanceolatum* 02**

***Santalum acuminatum* 01**  
***Santalum acuminatum* 02**  
***Santalum acuminatum* 03**  
***Santalum acuminatum* 04**  
***Santalum acuminatum* 05**

***Santalum spicatum* 06**  
***Santalum spicatum* 07**

***Santalum murrayanum* 01**  
***Santalum murrayanum* 02**  
***Santalum murrayanum* 03**  
***Santalum murrayanum* 04**  
***Santalum murrayanum* 05**

0.005



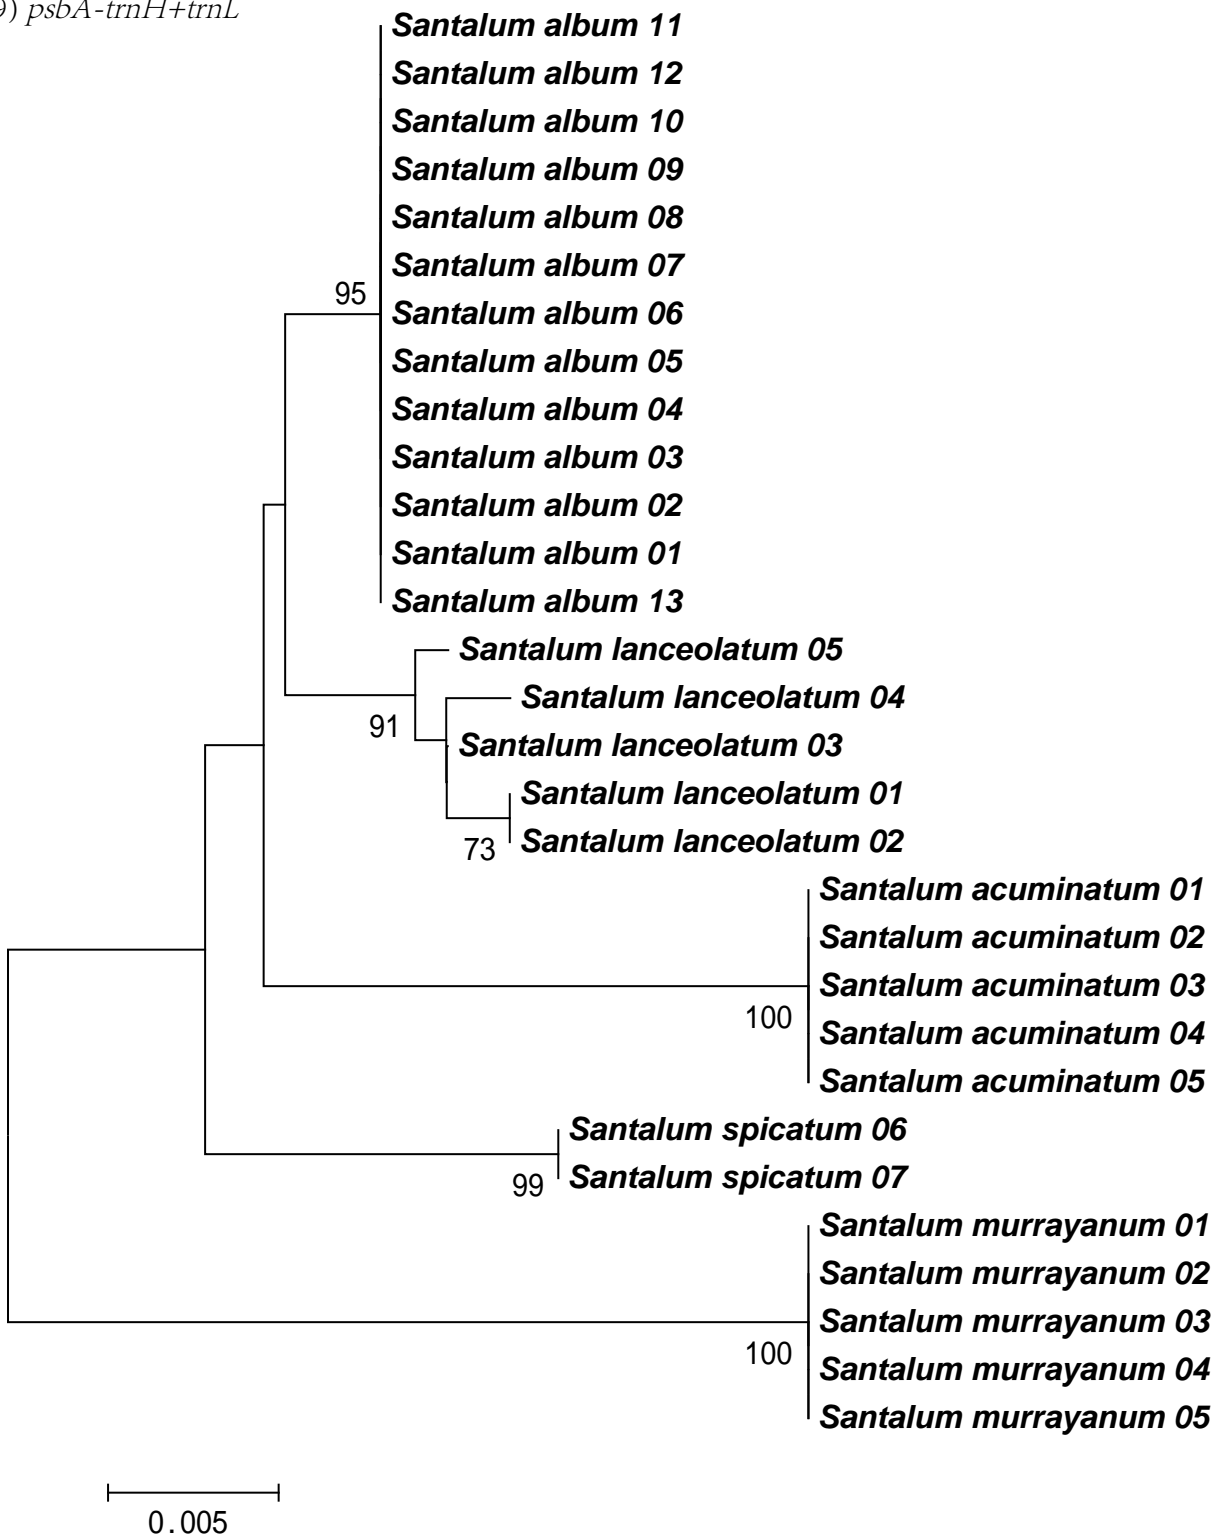

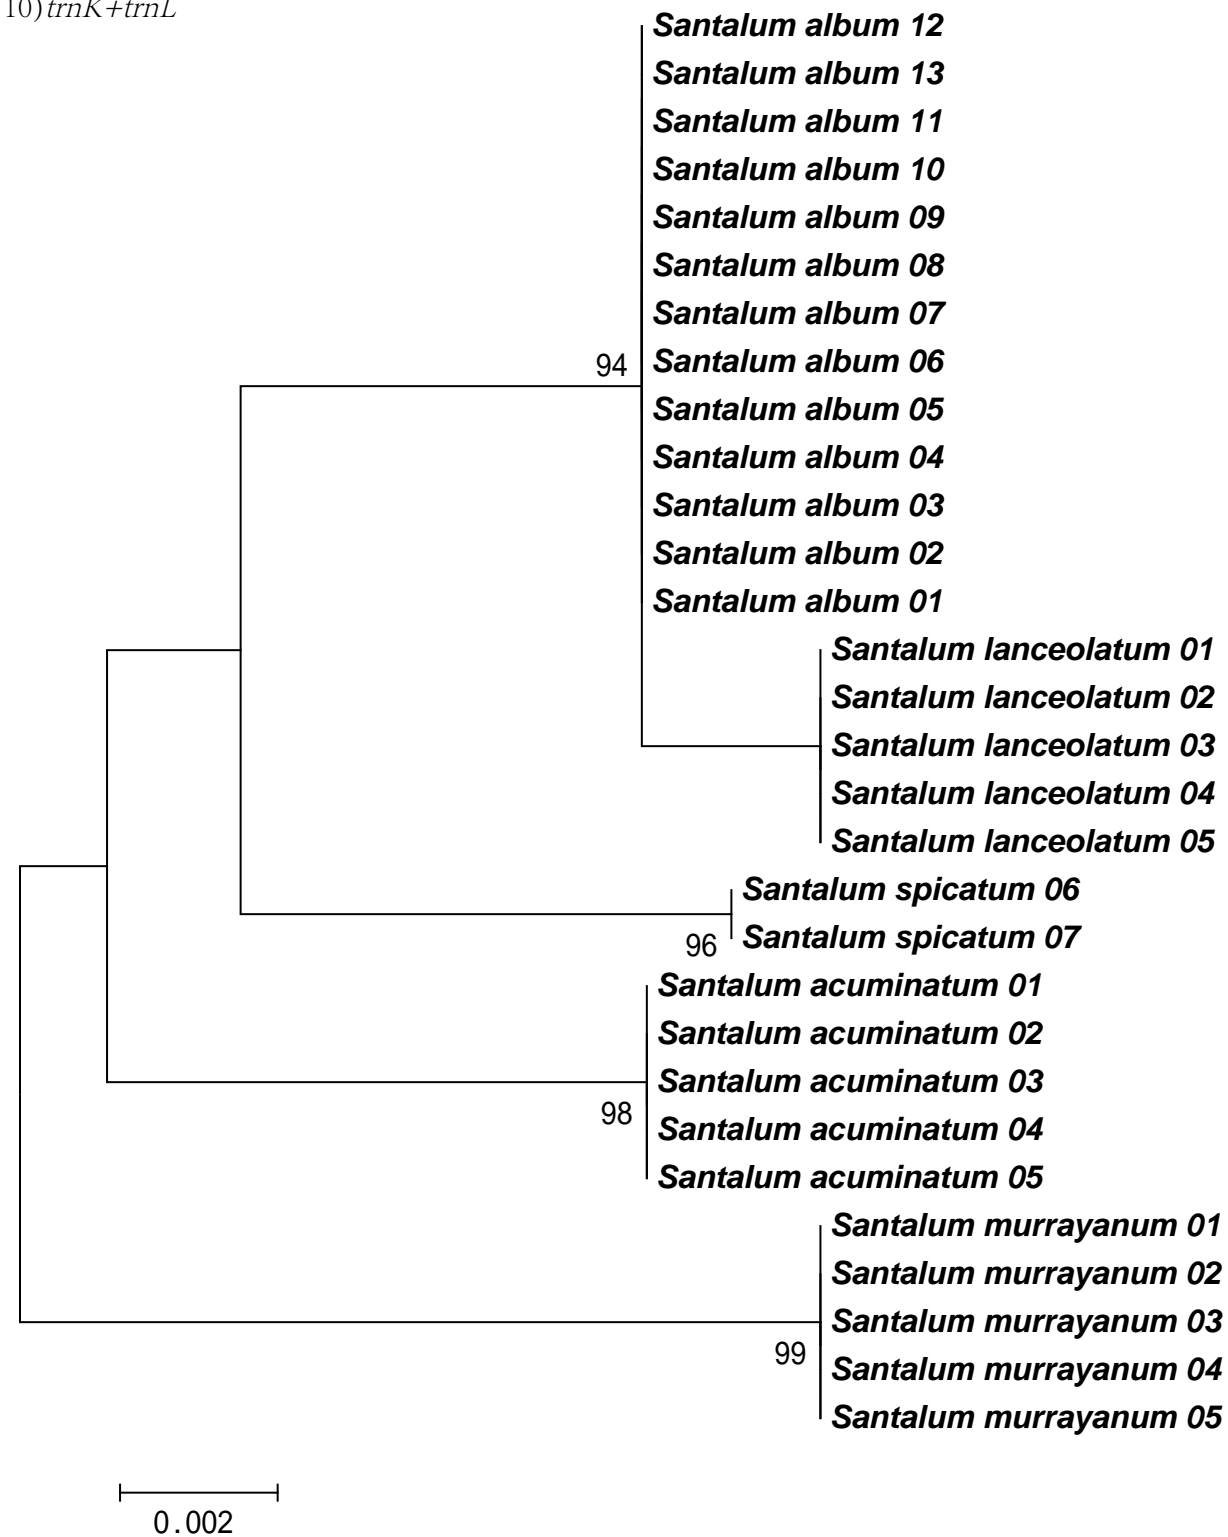

11) *matK+psbA-trnH+trnK*

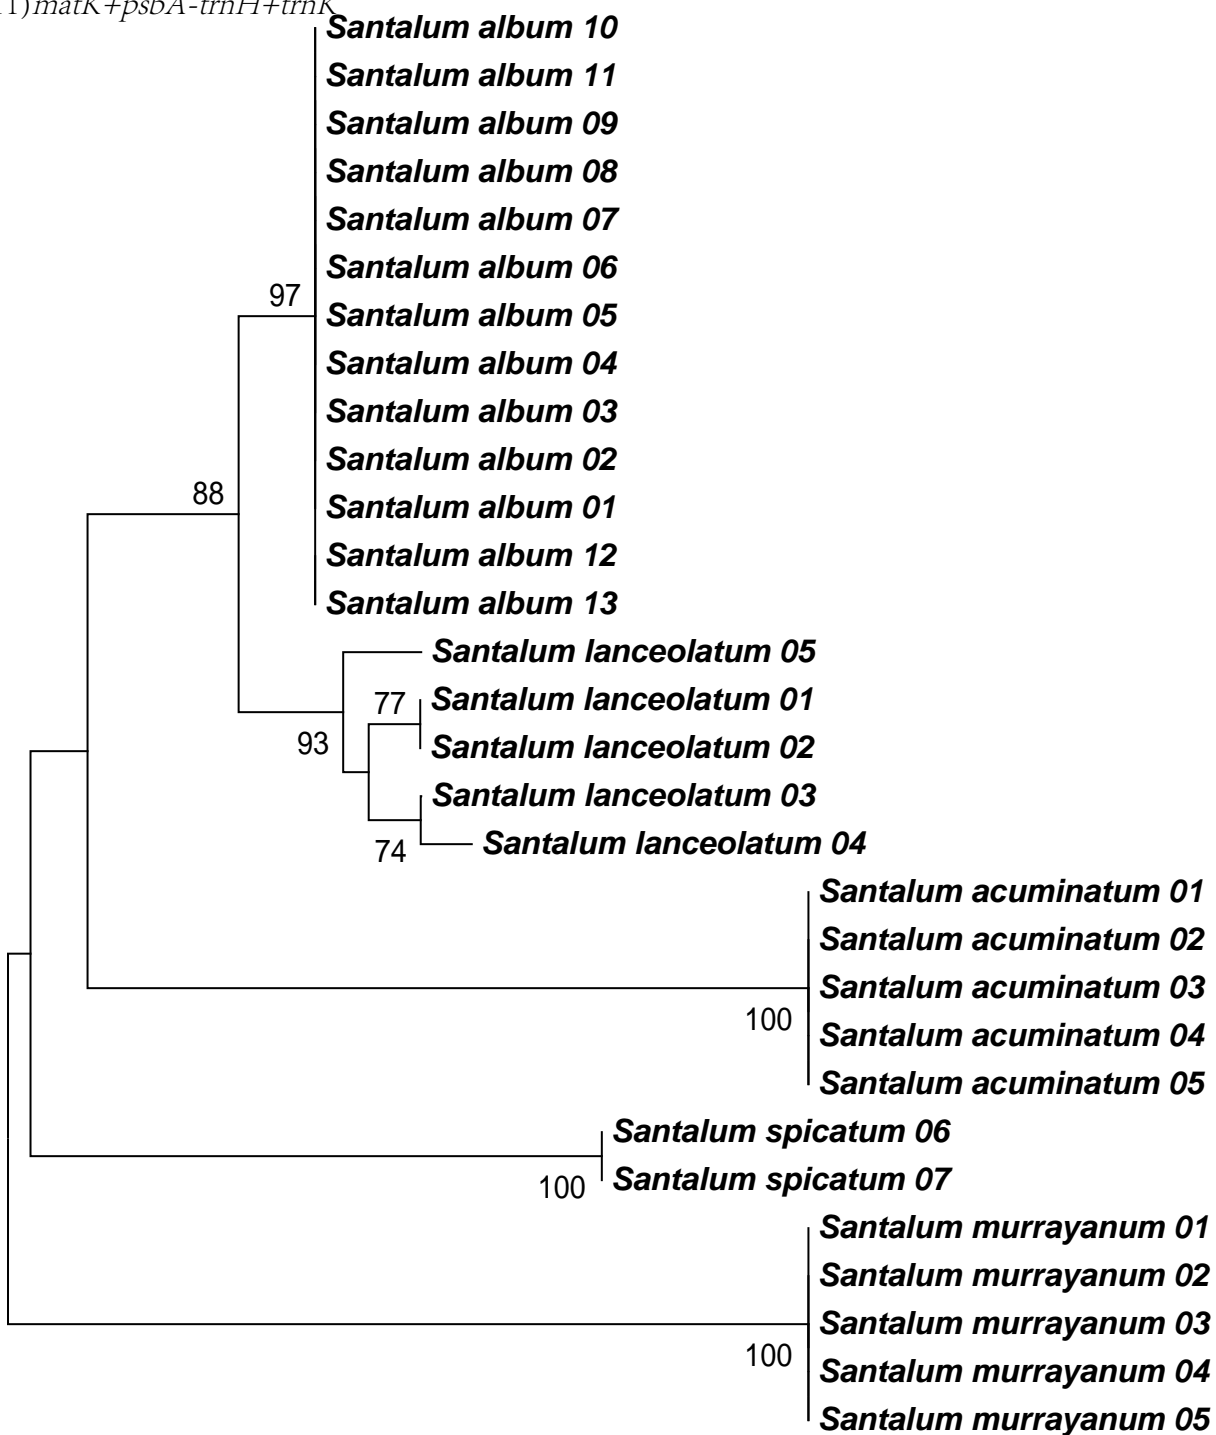

0.002

12) *matK+psbA-trnH+trnL*

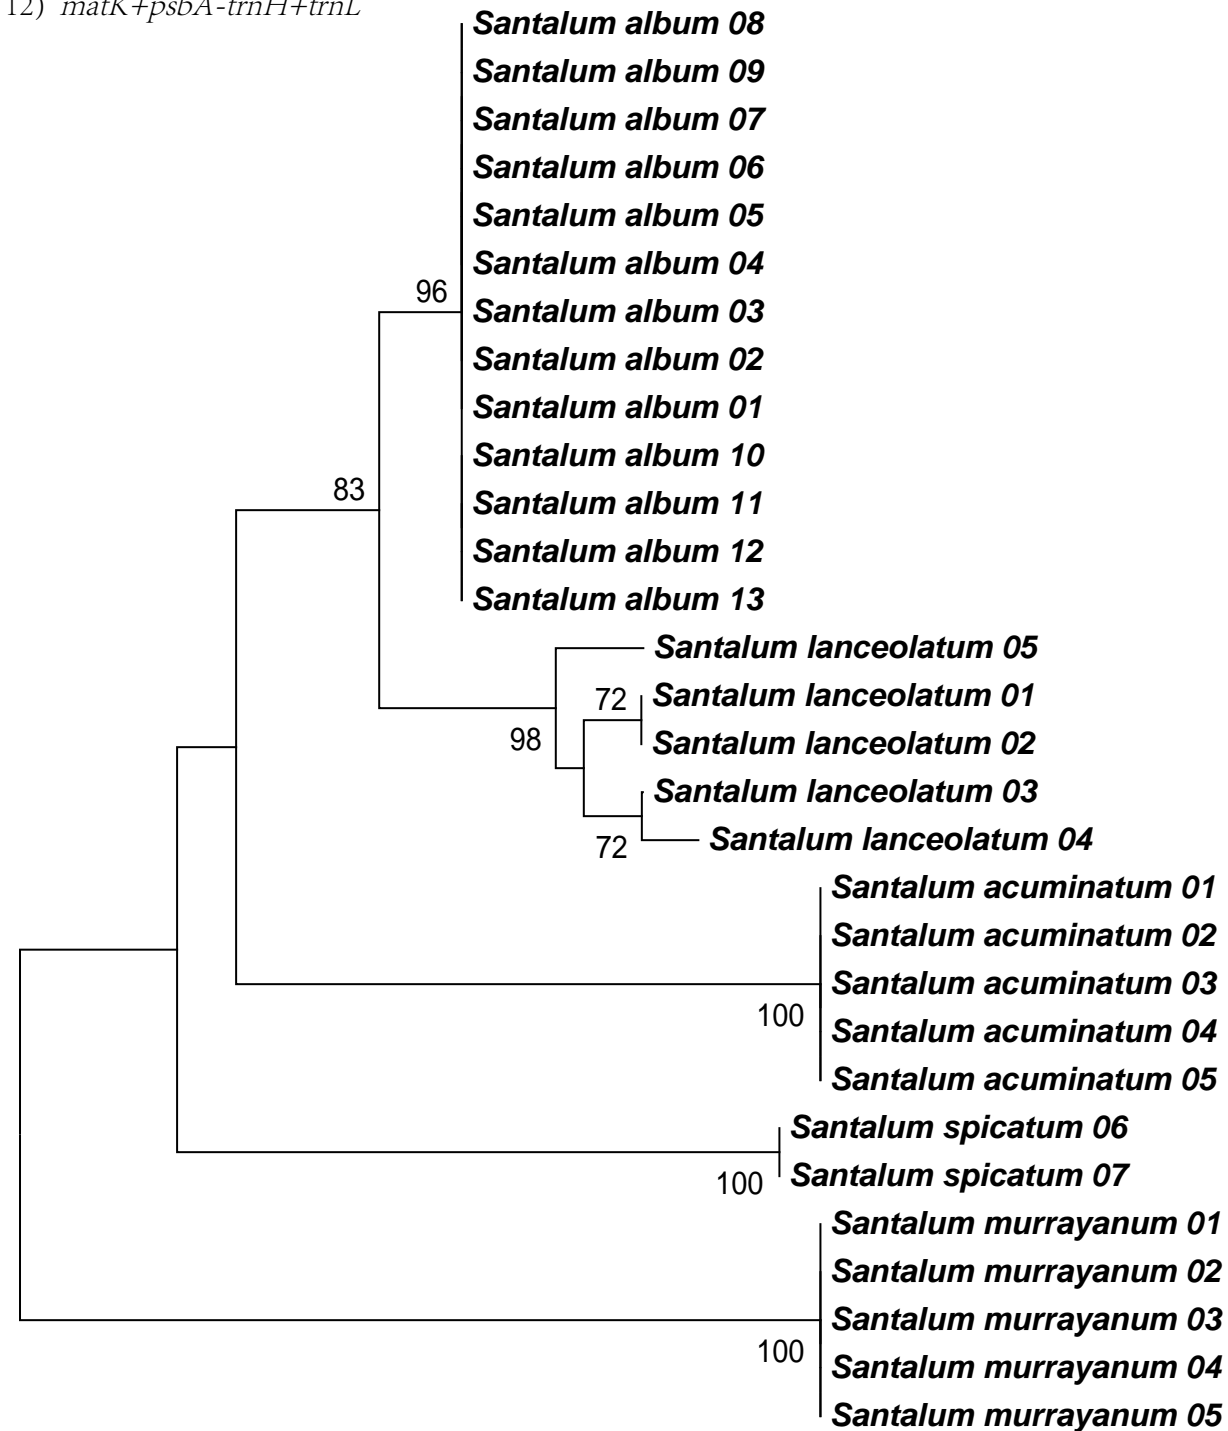

0.002

13) *matK+trnK+trnL*

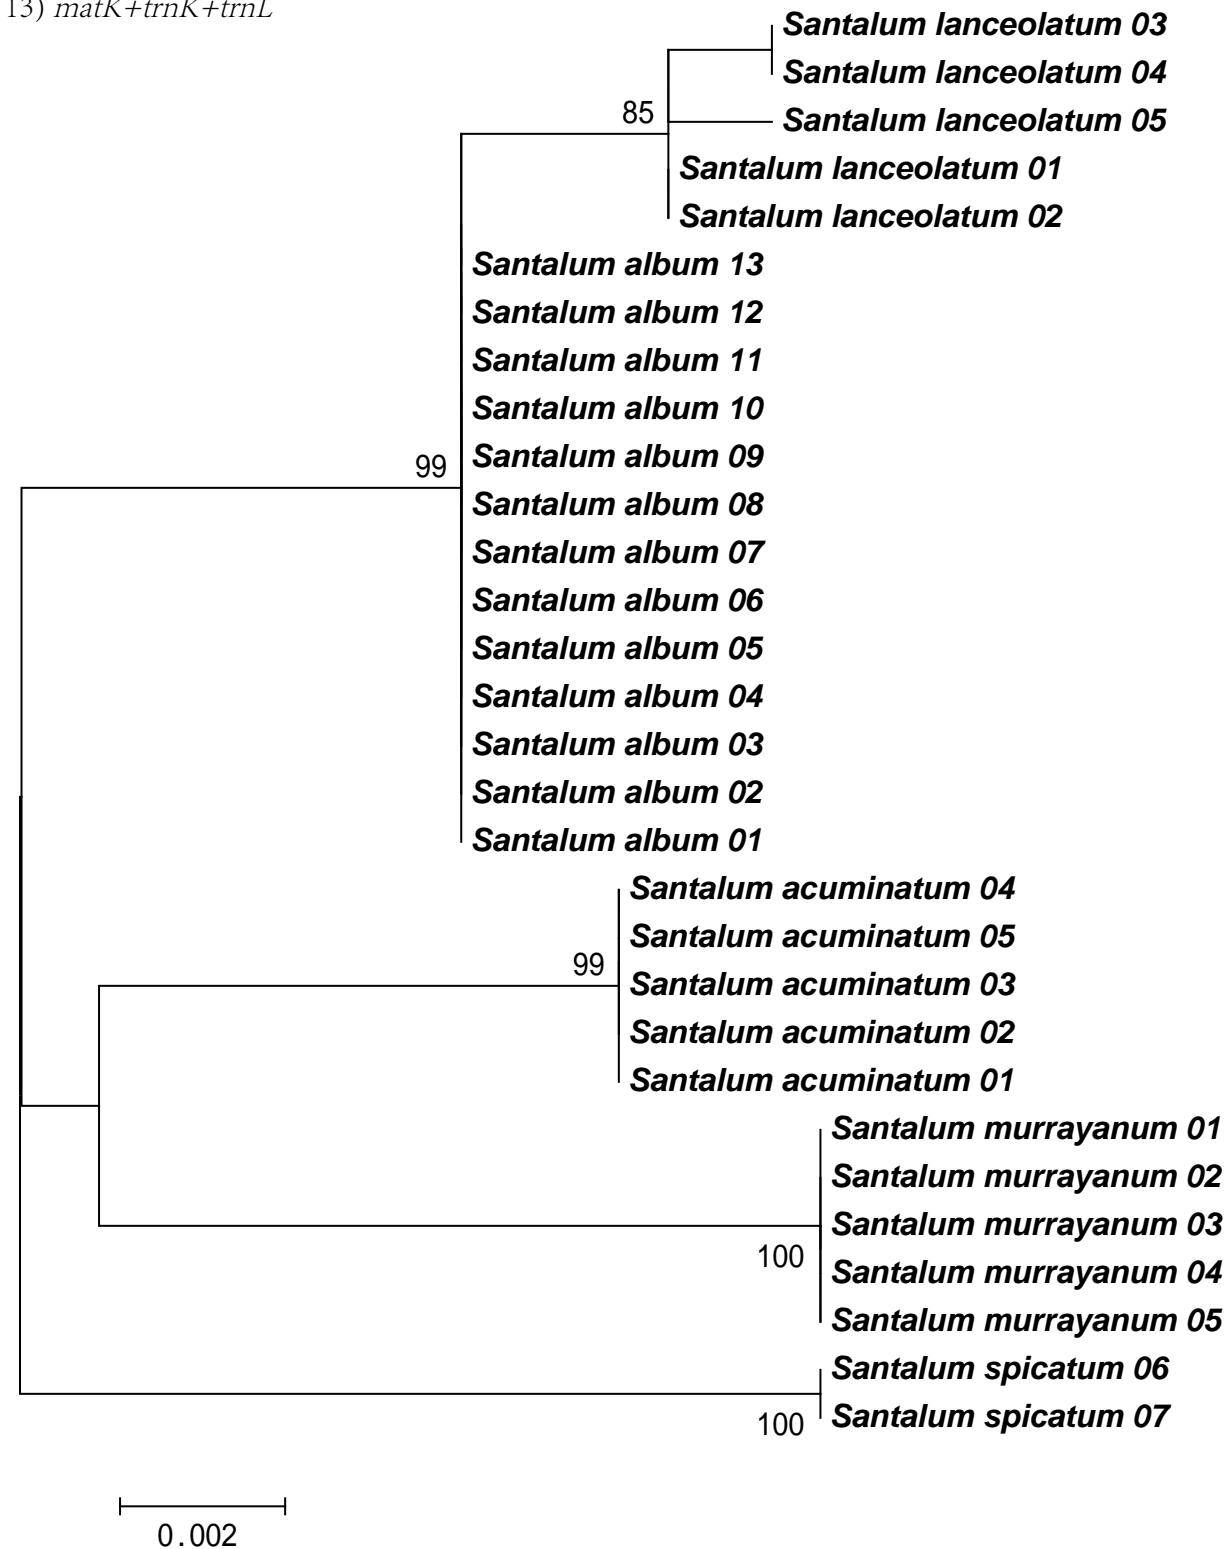

14) *psbA-trnH+trnK+trnL*

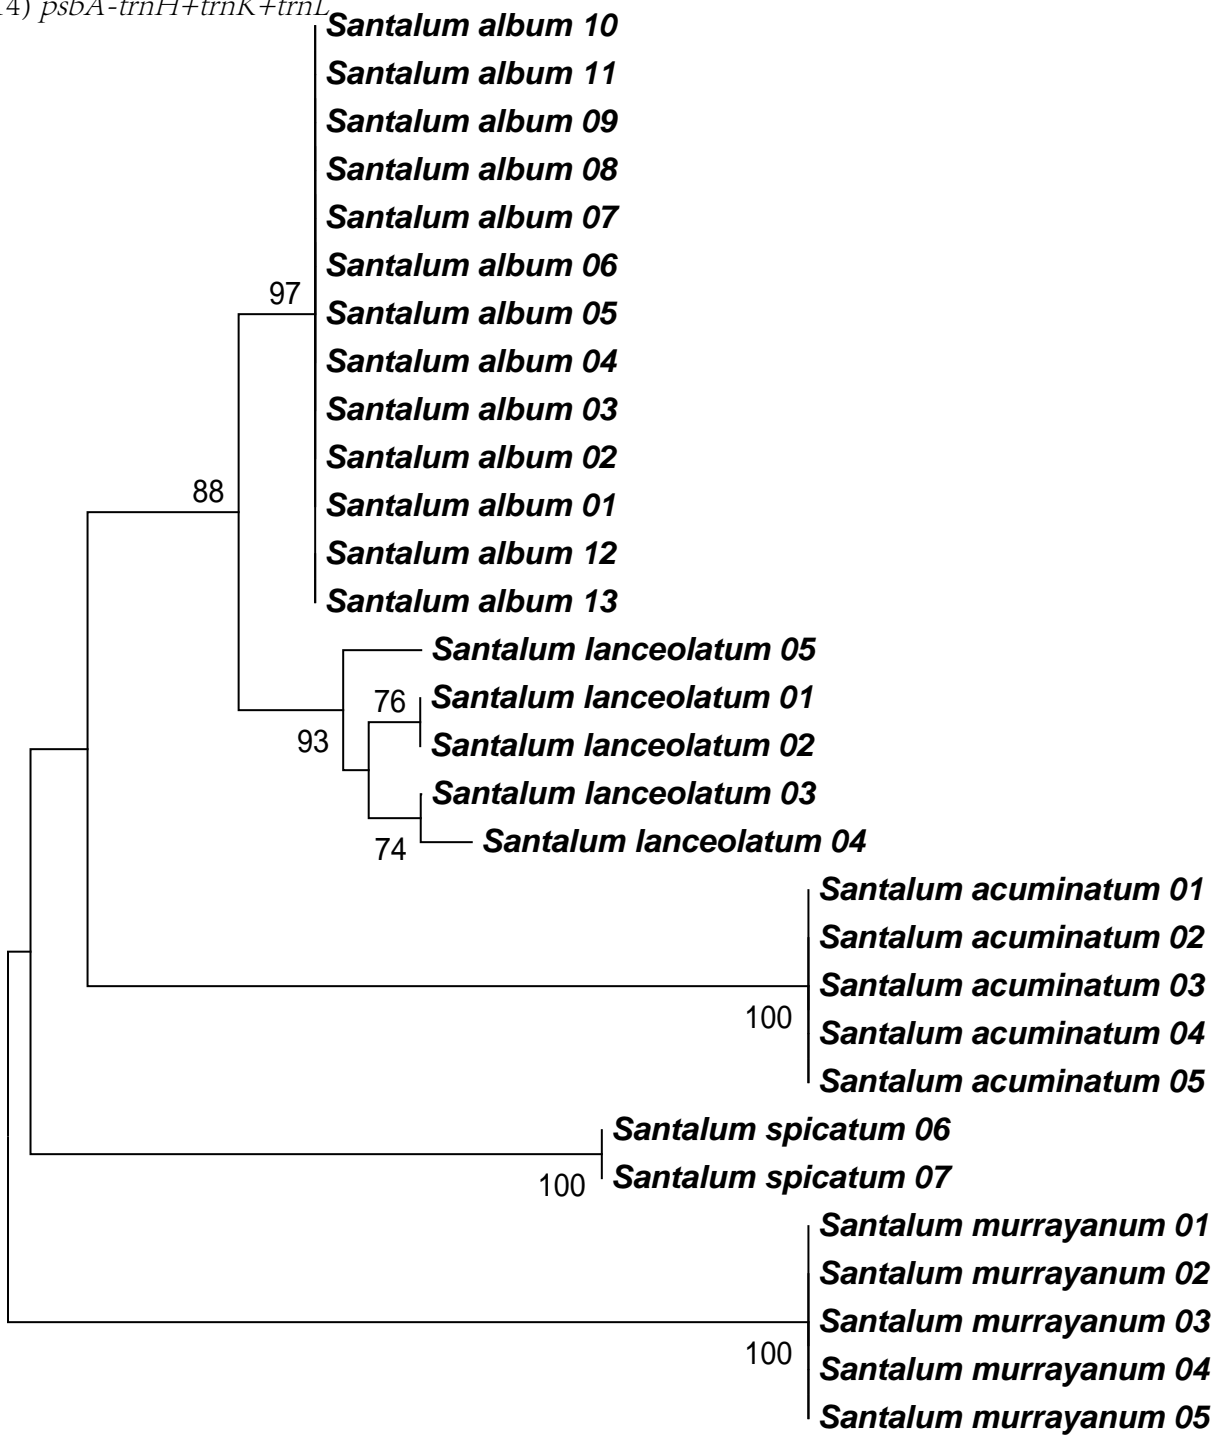

0.002

15) *matK+psbA-trnH+trnK+trnL*

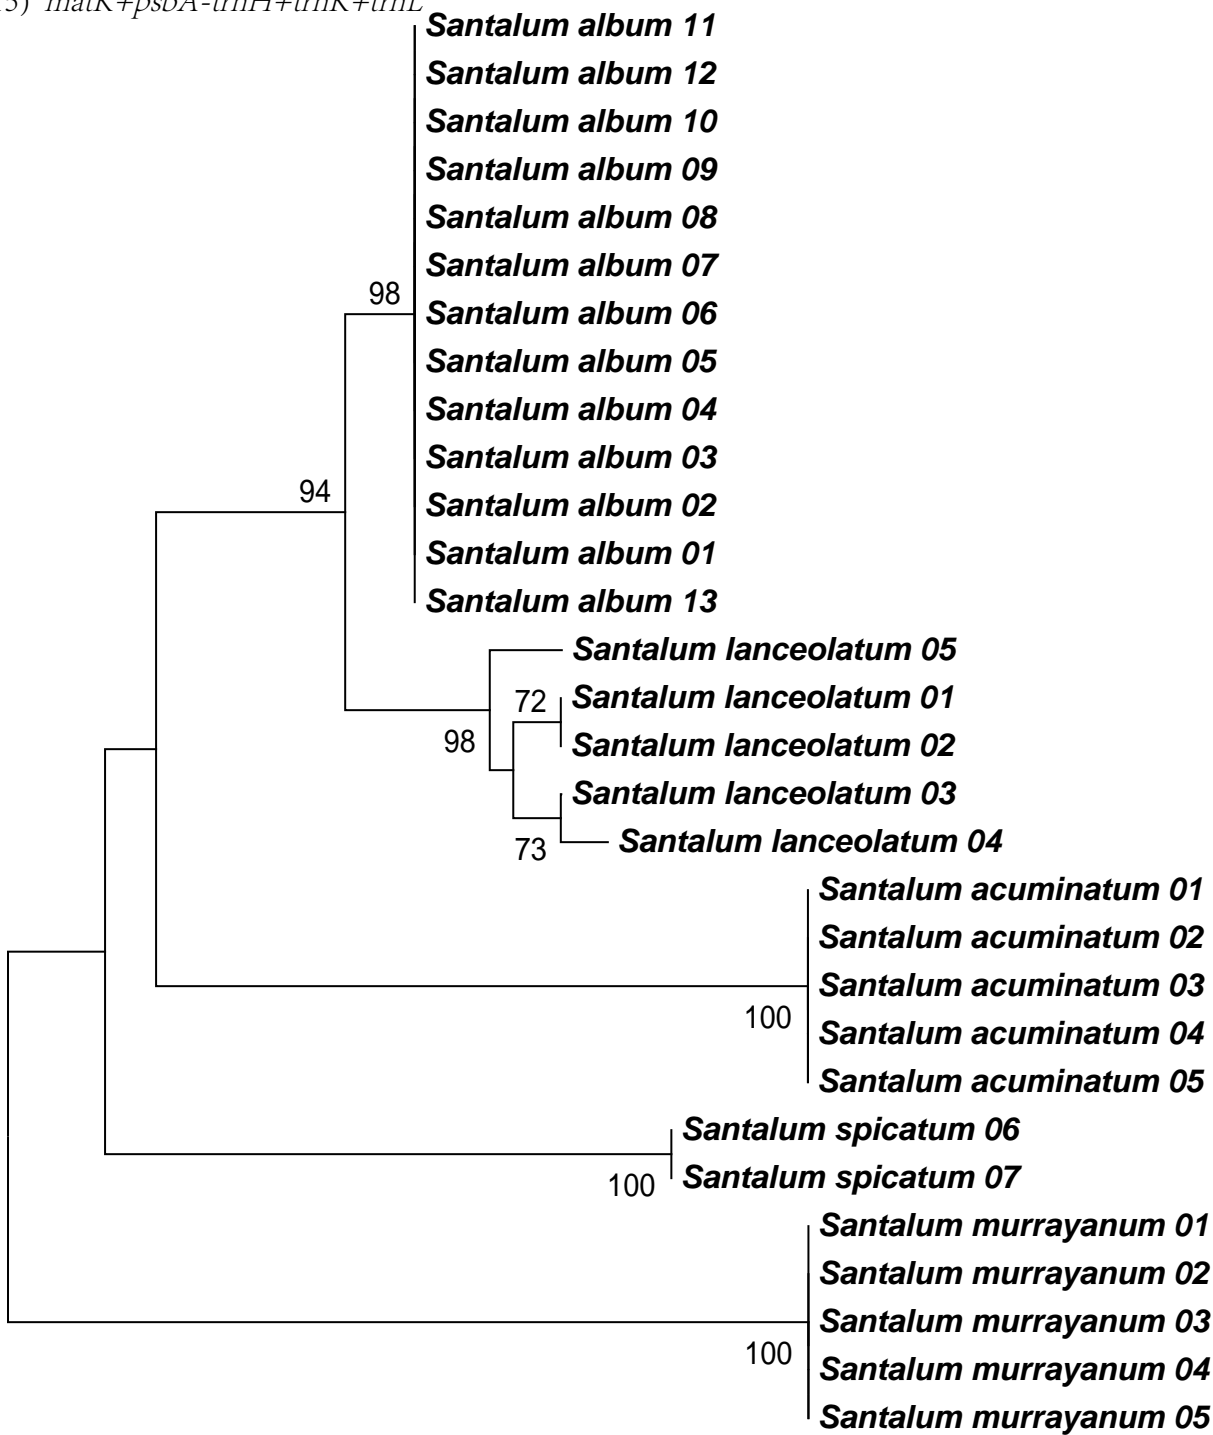

0.002
